# Supplementary material
Source: Springer Nature journal article supplement (https://www.springermedizin.de/resource/supplementary/12889_2009_1998_MOESM4_ESM.pdf/9487250)

**A**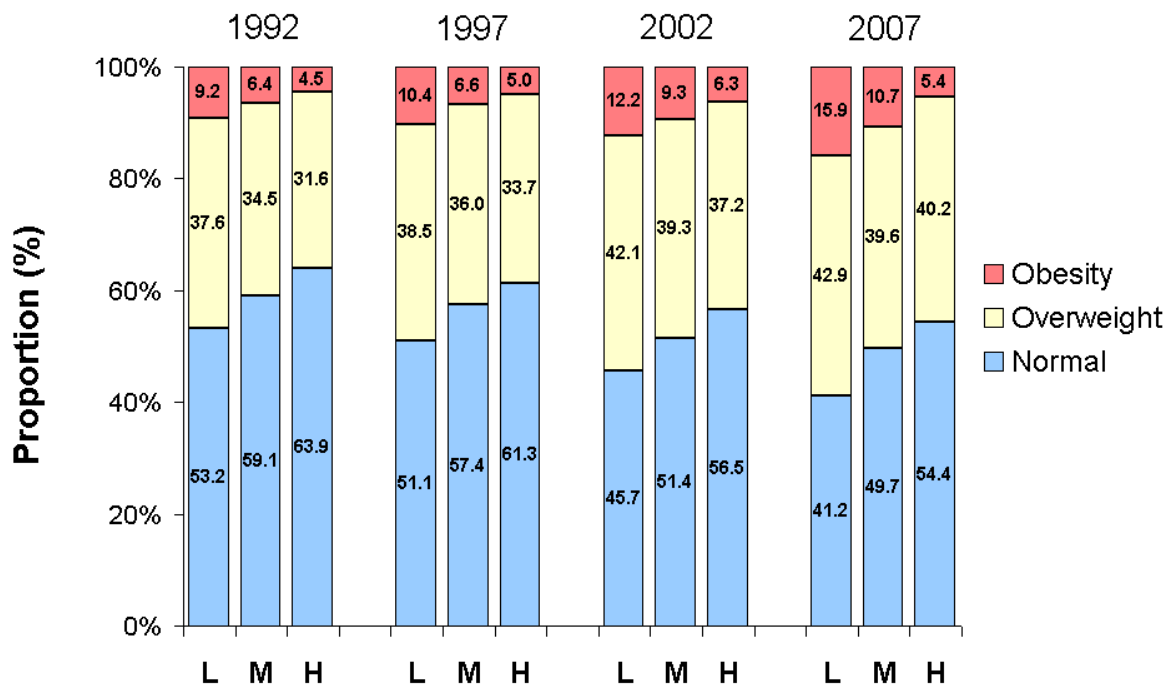**B**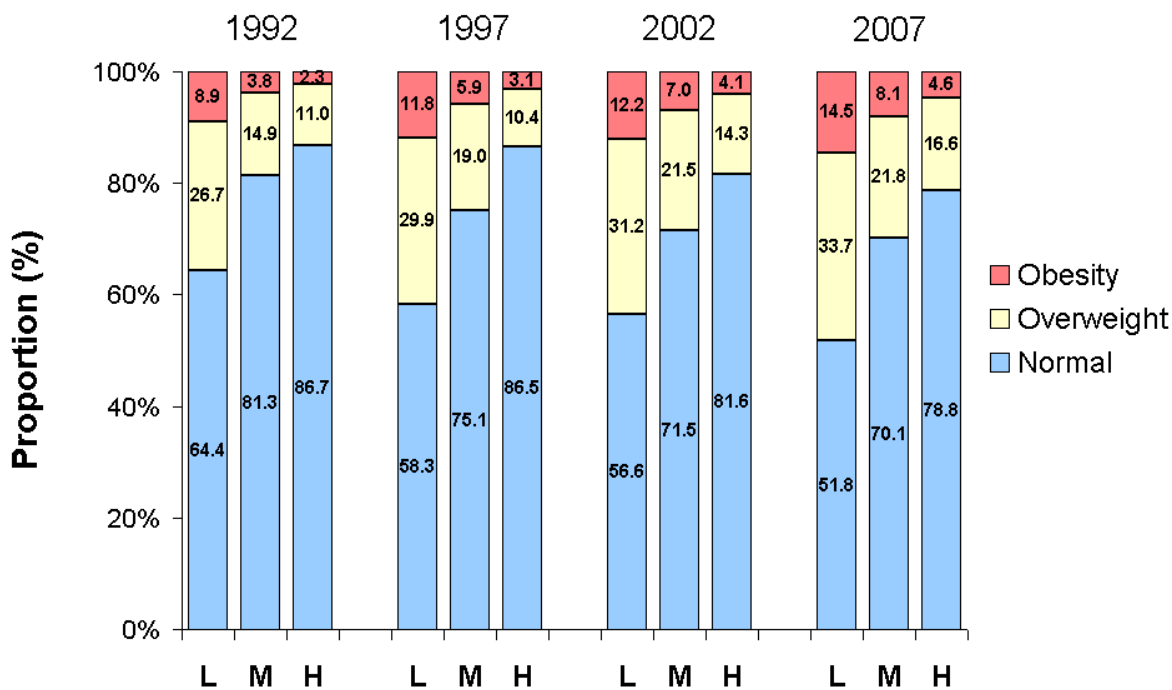

Supplement: MOESM4 [file 9487250]
